# Supplementary material for: Altered lignocellulose chemical structure and molecular assembly in CINNAMYL ALCOHOL DEHYDROGENASE-deficient rice
Source: PubMed Central journal article supplement (PMC6868246; doi:10.1038/s41598-019-53156-8), 2019-11-20
Supplement: 41598_2019_53156_MOESM1_ESM.pdf [file 41598_2019_53156_MOESM1_ESM.pdf]

## SUPPLEMENTARY INFORMATION

### Altered lignocellulose chemical structure and molecular assembly in *CINNAMYL ALCOHOL DEHYDROGENASE*-deficient rice

Andri Fadillah Martin<sup>1,2,\*</sup>, Yuki Tobimatsu<sup>1,\*†</sup>, Ryosuke Kusumi<sup>3</sup>,  
Naoyuki Matsumoto<sup>1</sup>, Takuji Miyamoto<sup>1</sup>, Pui Ying Lam<sup>1</sup>, Masaomi Yamamura<sup>1</sup>,  
Taichi Koshihara<sup>1</sup>, Masahiro Sakamoto<sup>3</sup>, Toshiaki Umezawa<sup>1,4,†</sup>

<sup>1</sup>Research Institute for Sustainable Humanosphere, Kyoto University, Uji, Kyoto 611-0011, Japan; <sup>2</sup>Research Center for Biotechnology, Indonesian Institute of Sciences (LIPI), Jl. Bogor KM 46 Cibinong Bogor 16911, Indonesia; <sup>3</sup>Graduate School of Agriculture, Kyoto University, Sakyo-ku, Kyoto 606-8502, Japan; <sup>4</sup>Research Unit for Development of Global Sustainability, Kyoto University, Uji, Kyoto 611-0011, Japan;

†Correspondence: Yuki Tobimatsu ([ytobimatsu@rish.kyoto-u.ac.jp](mailto:ytobimatsu@rish.kyoto-u.ac.jp)) and  
Toshiaki Umezawa ([tomezawa@rish.kyoto-u.ac.jp](mailto:tomezawa@rish.kyoto-u.ac.jp))

#### List of Materials

**Table S1.** Growth phenotypes of wild-type and *cad2* rice plants.

**Table S2.** Saccharification performance of wild-type and *cad2* rice plants.

**Table S3.** Aromatic peak assignments for HSQC NMR spectra

**Table S4.** Aliphatic and aldehyde peak assignments for HSQC NMR spectra

**Figure S1.** Morphological phenotype of wild-type and *cad2* rice plants.

**Figure S2.** HSQC NMR spectra of lignin-enriched cell wall samples.

**Figure S3.** WAXD profiles of wild-type and *cad2* rice cell wall powders.

**Table S1.** Growth phenotypes of wild-type (WT) and *cad2* mutant plants

| Trait                              | WT          | <i>cad2</i> |
|------------------------------------|-------------|-------------|
| Plant Height <sup>a</sup> (cm)     | 107.1 ± 9.8 | 123.6 ± 5.2 |
| Culm length <sup>b</sup> (cm)      | 75.8 ± 5.4  | 79.9 ± 1.7  |
| Ear length (cm)                    | 19.5 ± 1.8  | 19.5 ± 1.2  |
| Tiller number                      | 8.0 ± 1.1   | 9.5 ± 1.0   |
| Ear number                         | 7.8 ± 1.2   | 10.3 ± 2.2  |
| Dry mass of culm (g)               | 5.2 ± 1.5   | 4.9 ± 0.9   |
| Dry mass of leaf sheath (g)        | 5.4 ± 1.1   | 5.4 ± 0.8   |
| Dry mass of leaf blade (g)         | 5.5 ± 0.9   | 4.8 ± 0.8   |
| CWR yield of culm (%) <sup>c</sup> | 48.5 ± 3.2  | 48.3 ± 3.2  |

Values are means ± SD ( $n = 3$ ) <sup>a</sup> Length from cotyledonary node to the tip of the top leaf. <sup>b</sup> Length from cotyledonary node to panicle base. <sup>c</sup> CWR, cell wall residue.

**Table S2.** Saccharification performance of wild-type (WT) and *cad2* mutant plants

| Glucose yield             | WT           | <i>cad2</i>          |
|---------------------------|--------------|----------------------|
| Per cell walls (mg/g CWR) | 180.4 ± 35.4 | <b>238.4 ± 20.2*</b> |
| Per glucan (mg/g glucan)  | 346.4 ± 72.3 | <b>471.2 ± 50.5*</b> |

Values are glucose yields after 24 h saccharification and means ± standard deviation (SD) from individually analyzed plants ( $n = 3$ ). Asterisks indicate significant differences between WT and *cad2* mutant plants (Student's *t*-test, \*:  $p < 0.05$ ). CWR, cell wall residue.

**Table S3.** Aromatic peak assignments for solution-state 2D HSQC NMR spectra of rice cell wall and lignin samples

| Labels                   | $\delta_C/\delta_H$ (ppm) | Assignment                                               | Note                                                                                        |
|--------------------------|---------------------------|----------------------------------------------------------|---------------------------------------------------------------------------------------------|
| <b>H<sub>2/6</sub></b>   | 127.9/7.17                | C2–H2 and C6–H6 in <i>p</i> -hydroxyphenyl units         | Potentially overlap with residual proteins [1]                                              |
| <b>H<sub>3/5</sub></b>   | ca. 116/6.8               | C3–H3 and C5–H5 in <i>p</i> -hydroxyphenyl units         | Overlap with <b>G<sub>5/6</sub></b> , <b>pCA<sub>3/5</sub></b> and <b>G'<sub>5/6</sub></b>  |
| <b>G<sub>2</sub></b>     | 111.2/7.05                | C2–H2 in guaiacyl units                                  |                                                                                             |
| <b>G<sub>5/6</sub></b>   | ca. 116/6.8, 119.3/6.88   | C5–H5 and C6–H6 in guaiacyl units                        | Overlap with <b>H<sub>3/5</sub></b> , <b>G<sub>5/6</sub></b> and <b>G'<sub>5/6</sub></b>    |
| <b>S<sub>2/6</sub></b>   | 104.2/6.77                | C2–H2 and C6–H6 in syringyl units                        |                                                                                             |
| <b>pCA<sub>2/6</sub></b> | 130.3/7.48                | C2–H2 and C6–H6 in <i>p</i> -coumarate units             |                                                                                             |
| <b>pCA<sub>3/5</sub></b> | 115.6/6.85                | C3–H3 and C5–H5 in <i>p</i> -coumarate units             | Overlap with <b>H<sub>3/5</sub></b> , <b>pCA<sub>3/5</sub></b> and <b>G'<sub>5/6</sub></b>  |
| <b>pCA<sub>7</sub></b>   | 145.1/7.63                | C7–H7 in <i>p</i> -coumarate units                       | Potentially overlap with residual ferulates                                                 |
| <b>pCA<sub>8</sub></b>   | 113.8/6.36                | C8–H8 in <i>p</i> -coumarate units                       | Potentially overlap with residual ferulates                                                 |
| <b>T<sub>3</sub></b>     | 104.9/7.05                | C3–H3 in tricin units                                    |                                                                                             |
| <b>T<sub>6</sub></b>     | 99.1/6.32                 | C6–H6 in tricin units                                    |                                                                                             |
| <b>T<sub>8</sub></b>     | 94.2/6.60                 | C8–H8 in tricin units                                    |                                                                                             |
| <b>T<sub>2'/6'</sub></b> | 104.3/7.36                | C2'–H2' and C6'–H6' in tricin units                      |                                                                                             |
| <b>G'<sub>2</sub></b>    | 111.3/7.33                | C2–H2 in cinnamaldehyde-derived guaiacyl units           | Potentially overlap with residual ferulates                                                 |
| <b>G'<sub>5/6</sub></b>  | ca. 116/6.8, 123.3/7.12   | C5–H5 and C6–H6 in cinnamaldehyde-derived guaiacyl units | Overlap with <b>H<sub>3/5</sub></b> , <b>G<sub>5/6</sub></b> , and <b>pCA<sub>3/5</sub></b> |
| <b>S'<sub>2/6</sub></b>  | 107.1/7.26, 108.1/7.18    | C2–H2 and C6–H6 in cinnamaldehyde-derived syringyl units |                                                                                             |
| <b>I'<sub>7</sub></b>    | 138.3/7.41                | C7–H7 in cinnamaldehyde-derived 8–O–4 units              |                                                                                             |
| <b>IV''<sub>7</sub></b>  | 152.9/7.55                | C7–H7 in cinnamaldehyde end-units                        |                                                                                             |
| <b>IV''<sub>8</sub></b>  | 127.1/6.81                | C8–H8 in cinnamaldehyde end-units                        |                                                                                             |

Measured in DMSO-*d*<sub>6</sub>/Py-*d*<sub>5</sub> (4:1, v/v). Assignment was based on comparison with literature data: [1] Kim, H. et al. Characterization and elimination of undesirable protein residues in plant cell wall materials for enhancing lignin analysis by solution-state nuclear magnetic resonance spectroscopy. *Biomacromolecules*, **18**, 4184–4195 (2017). [2] Kim, H. & Ralph, J. Solution-state 2D NMR of ball-milled plant cell wall gels in DMSO-*d*<sub>6</sub>/pyridine-*d*<sub>5</sub>. *Org. Biomol. Chem.* **8**, 576–591 (2010). [3] Mansfield, S.D. et al. Whole plant cell wall characterization using solution-state 2D NMR. *Nat. Protoc.* **7**, 1579–1589 (2012). [4] Zhao, Q. et al. Loss of function of cinnamyl alcohol dehydrogenase 1 leads to unconventional lignin and a temperature-sensitive growth defect in *Medicago truncatula*. *Proc. Natl. Acad. Sci. USA* **110**, 13660–13665 (2013). [5] Lan, W. et al. Tricin, a flavonoid monomer in monocot lignification. *Plant Physiol.* **167**, 1284–1295 (2015). [6] Van Acker, R. et al. Different routes for conifer- and sinapaldehyde and higher saccharification upon deficiency in the dehydrogenase CAD1. *Plant Physiol.* **175**, 1018–1039 (2017). [7] Tarmadi, D. et al. NMR studies on lignocellulose deconstructions in the digestive system of the lower termite *Coptotermes formosanus* Shiraki. *Sci. Rep.* **8**, 1290 (2018).

**Table S4.** Aliphatic and aldehyde peak assignments for solution-state 2D HSQC NMR spectra of rice cell wall and lignin samples

| Labels                            | $\delta_C/\delta_H$ (ppm)     | Assignment                                                                           | Note                          |
|-----------------------------------|-------------------------------|--------------------------------------------------------------------------------------|-------------------------------|
| <b>methoxyl</b>                   | 3.72/55.7                     | C–H in aromatic methoxyl groups                                                      |                               |
| <b>I<math>_{\alpha}</math></b>    | 71.9/4.99                     | C $_{\alpha}$ –H $_{\alpha}$ in $\beta$ –O–4 units                                   |                               |
| <b>I<math>_{\beta}</math></b>     | 86.2/4.22                     | C $_{\beta}$ –H $_{\beta}$ in $\beta$ –O–4 units                                     | Connected to S aromatic units |
|                                   | 83.5/4.47                     | C $_{\beta}$ –H $_{\beta}$ in $\beta$ –O–4 units                                     | Connected to G aromatic units |
| <b>I<math>_{\gamma}</math></b>    | ca. 60.2/3.72                 | C $_{\gamma}$ –H $_{\gamma}$ in $\beta$ –O–4 units                                   | $\gamma$ -free                |
|                                   | ca. 63.9/4.32                 | C $_{\gamma}$ –H $_{\gamma}$ in $\beta$ –O–4 units                                   | $\gamma$ -esterified          |
| <b>II<math>_{\alpha}</math></b>   | 87.2/5.50                     | C $_{\alpha}$ –H $_{\alpha}$ in $\beta$ –5 units                                     |                               |
| <b>II<math>_{\beta}</math></b>    | 53.6/3.49                     | C $_{\beta}$ –H $_{\beta}$ in $\beta$ –5 units                                       |                               |
| <b>III<math>_{\alpha}</math></b>  | 85.0/4.71                     | C $_{\alpha}$ –H $_{\alpha}$ in resinol-type $\beta$ – $\beta$ substructures         |                               |
| <b>III<math>_{\beta}</math></b>   | 53.7/3.01                     | C $_{\beta}$ –H $_{\beta}$ in resinol-type $\beta$ – $\beta$ substructures           |                               |
| <b>III'<math>_{\alpha}</math></b> | 82.9/4.99                     | C $_{\alpha}$ –H $_{\alpha}$ in tetrahydrofuran-type $\beta$ – $\beta$ substructures |                               |
| <b>III'<math>_{\beta}</math></b>  | 47.5/2.69                     | C $_{\beta}$ –H $_{\beta}$ in tetrahydrofuran-type $\beta$ – $\beta$ substructures   |                               |
| <b>IV<math>_{\gamma}</math></b>   | 61.8/4.14                     | C $_{\gamma}$ –H $_{\gamma}$ in cinnamyl alcohol end-groups                          |                               |
| <b>IV'<math>_{\gamma}</math></b>  | 64.3/4.79                     | C $_{\gamma}$ –H $_{\gamma}$ in cinnamyl alcohol ester end-groups                    |                               |
| <b>I'<math>_{\beta}</math></b>    | 186.2/9.26 (I' $_{S/\beta}$ ) | C9–H9 in cinnamaldehyde-derived 8–O–4 units                                          | Connected to S aromatic units |
|                                   | 187.7/9.59 (I' $_{G/\beta}$ ) | C9–H9 in cinnamaldehyde-derived 8–O–4 units                                          | Connected to G aromatic units |
| <b>IV''<math>_{\beta}</math></b>  | 193.8/9.65                    | C9–H9 in cinnamaldehyde end-units                                                    |                               |
| <b>IV'''<math>_{\beta}</math></b> | 190.6/9.74                    | C7–H7 in benzaldehyde end-units                                                      |                               |

Measured in DMSO- $d_6$ /Py- $d_5$  (4:1, v/v). Assignment was based on comparison with literature data: [1] Kim, H. et al. Characterization and elimination of undesirable protein residues in plant cell wall materials for enhancing lignin analysis by solution-state nuclear magnetic resonance spectroscopy. *Biomacromolecules*, **18**, 4184–4195 (2017). [2] Kim, H. & Ralph, J. Solution-state 2D NMR of ball-milled plant cell wall gels in DMSO- $d_6$ /pyridine- $d_5$ . *Org. Biomol. Chem.* **8**, 576–591 (2010). [3] Mansfield, S.D. et al. Whole plant cell wall characterization using solution-state 2D NMR. *Nat. Protoc.* **7**, 1579–1589 (2012). [4] Zhao, Q. et al. Loss of function of cinnamyl alcohol dehydrogenase 1 leads to unconventional lignin and a temperature-sensitive growth defect in *Medicago truncatula*. *Proc. Natl. Acad. Sci. USA* **110**, 13660–13665 (2013). [5] Lan, W. et al. Tricin, a flavonoid monomer in monocot lignification. *Plant Physiol.* **167**, 1284–1295 (2015). [6] Van Acker, R. et al. Different routes for conifer- and sinapaldehyde and higher saccharification upon deficiency in the dehydrogenase CAD1. *Plant Physiol.* **175**, 1018–1039 (2017). [7] Tarmadi, D. et al. NMR studies on lignocellulose deconstructions in the digestive system of the lower termite *Coptotermes formosanus* Shiraki. *Sci. Rep.* **8**, 1290 (2018).

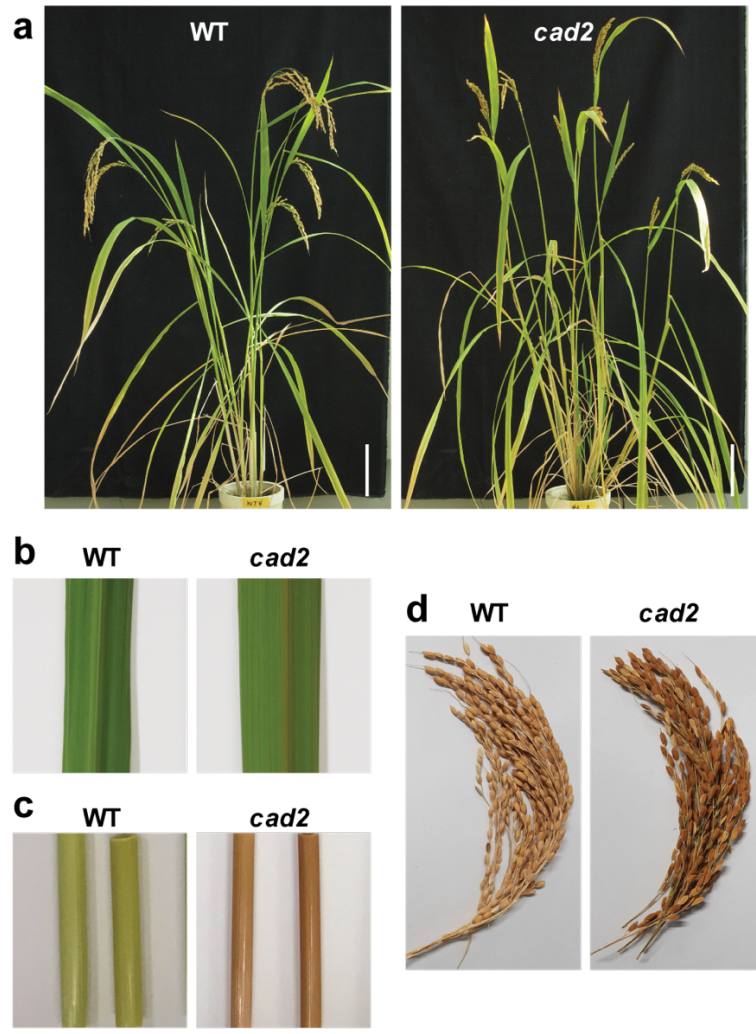

**Figure S1.** Morphological phenotype of wild-type (WT) and *cad2* mutant rice plants. Plants at the ripening stage (a), flag leaves (b) and culm straw (c) at the heading stage, and harvested panicles (d) are shown. Scale bars in a denote 10 cm.

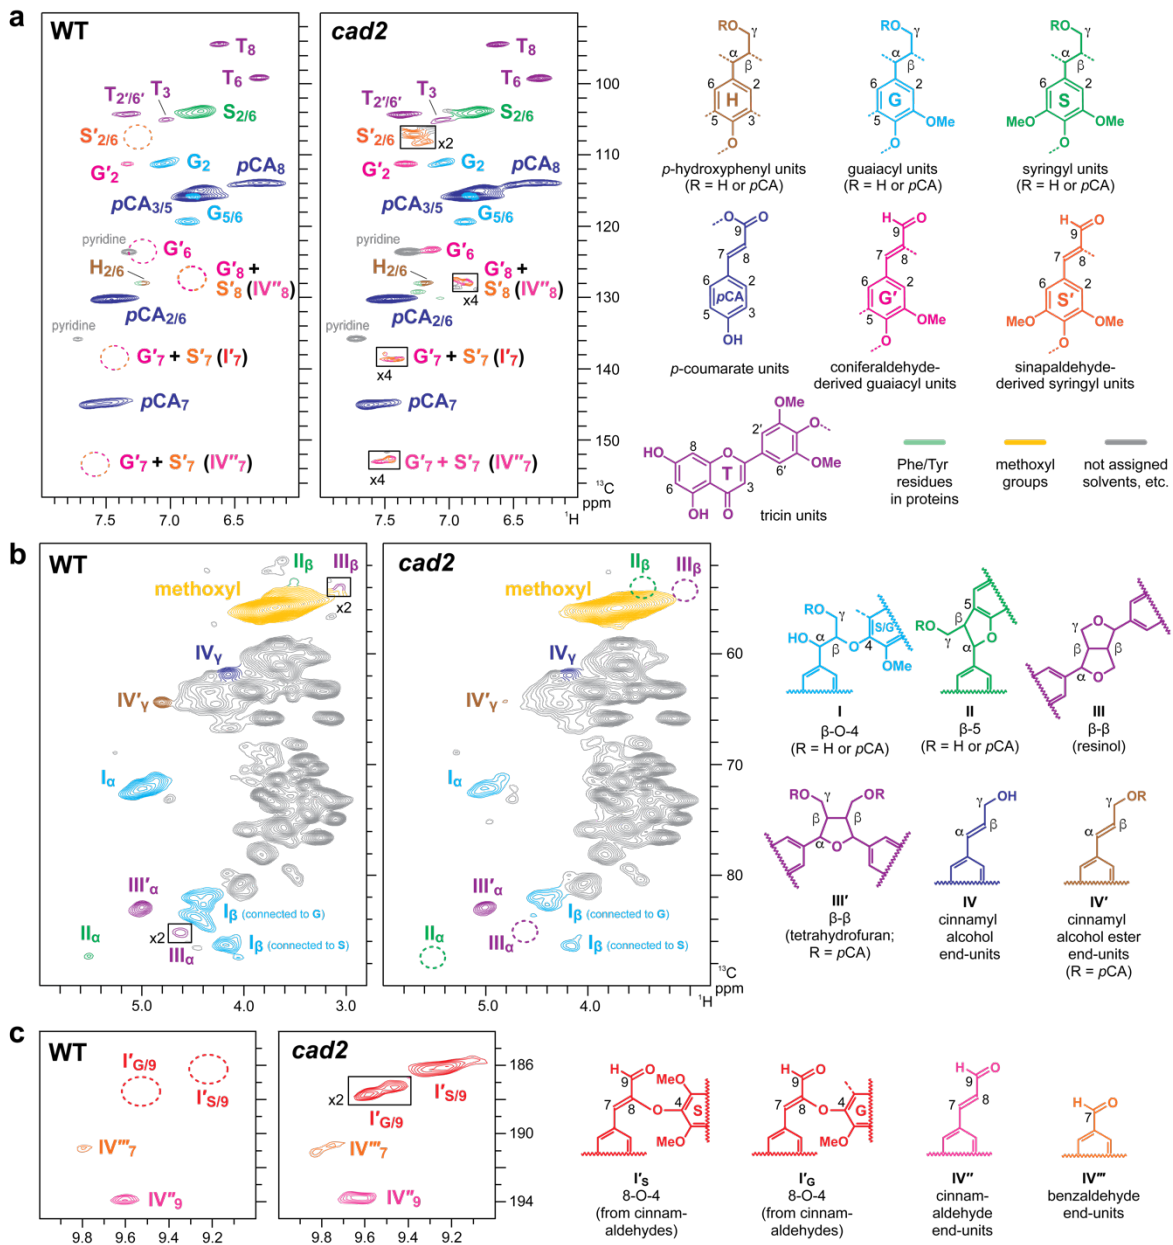

**Figure S2.** Solution-state two-dimensional short range  $^1\text{H}$ - $^{13}\text{C}$  correlation (HSQC) NMR analysis of lignin-enriched cell wall samples from wild-type (WT) and *cad2* mutant rice plants. **(a)** Aromatic sub-regions showing signals from major lignin aromatic units. **(b)** Oxygenated-aliphatic sub-regions showing signals from major lignin side-chain units. **(c)** Aldehyde sub-regions showing signals from aldehyde units. Contours are color-coded to match with the structures displayed. Boxes labeled  $\times 2$  and  $\times 4$  represent regions with scale vertically enlarged by 2- and 4-folds, respectively.

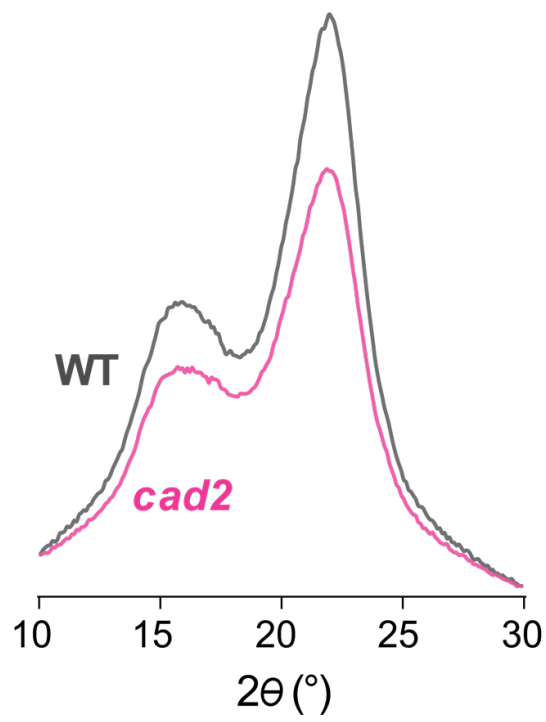

**Figure S3.** WAXD profiles of wild-type (WT) and *cad2* mutant rice cell wall powder samples.
